# Supplementary material
Source: PubMed Central journal article supplement (PMC4400804)

**Supplemental Figure 1.** Age distribution of subjects 18 years and younger with positive test for *Bordetella pertussis*.

Horizontal bars indicate CDC-suggested vaccination intervals.

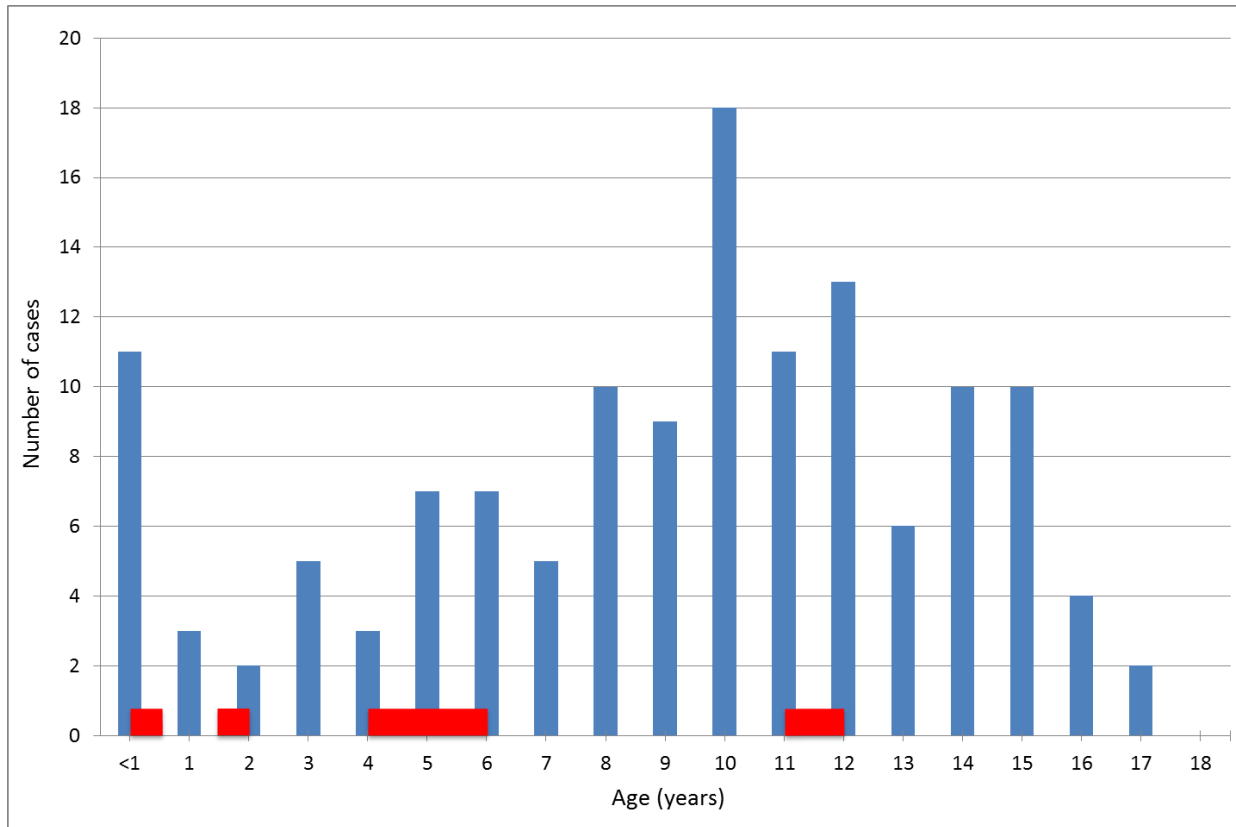

**Supplemental Figure 2. Age distribution (as percent of total for each group) of pertussis cases reported to the CDC from 1997-2000<sup>1</sup> (red) in comparison to age distribution of subjects in the current study with positive *Bordetella pertussis* PCR results in 2012 (blue).**

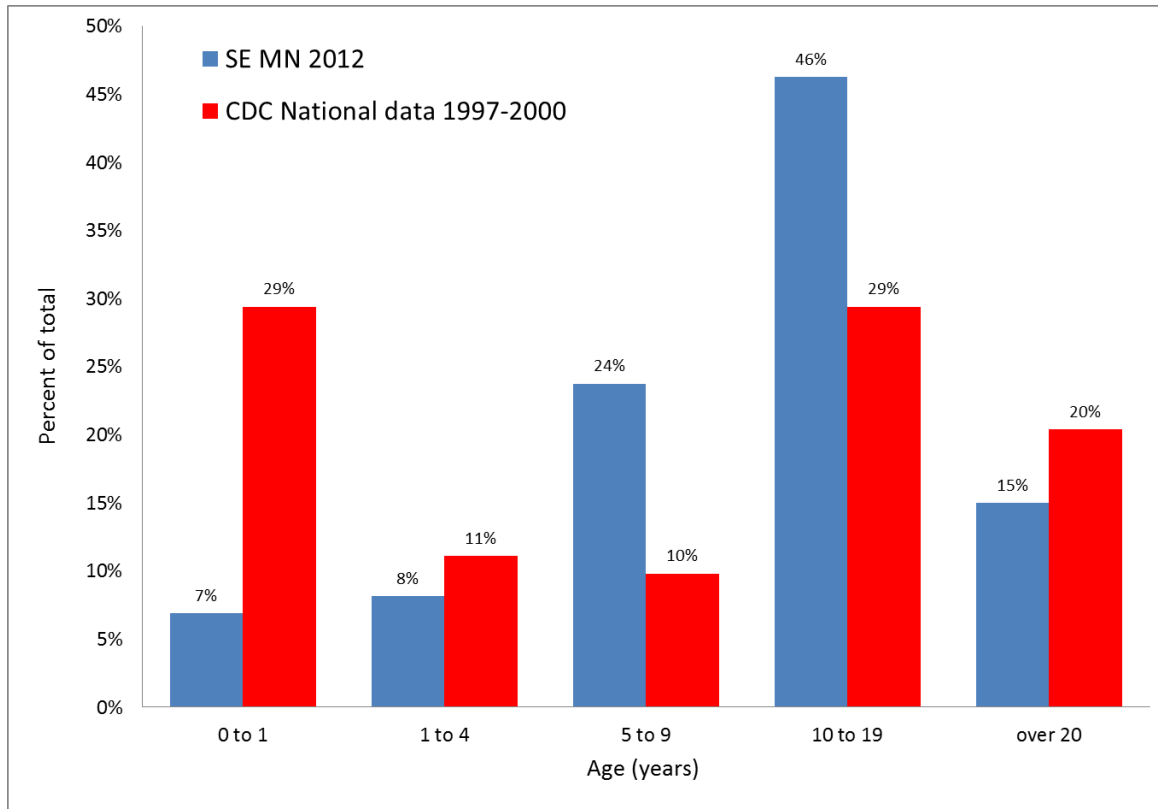

Supplement: NIHMS676963-supplement-SFig_1_and_2.pdf [file NIHMS676963-supplement-SFig_1_and_2.pdf]
